# Supplementary material for: Prognostic factors for adverse outcomes in patients with COVID-19: a field-wide systematic review and meta-analysis
Source: PubMed Central journal article supplement — Eur Respir J. 2022 Feb 3;59(2):2002964. doi: 10.1183/13993003.02964-2020 (PMC8576809; doi:10.1183/13993003.02964-2020), 2022-02-03

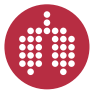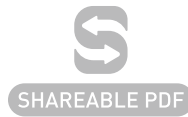

# Prognostic factors for adverse outcomes in patients with COVID-19: a field-wide systematic review and meta-analysis

Vanesa Bellou <sup>1</sup>, Ioanna Tzoulaki <sup>1,2,3</sup>, Maarten van Smeden <sup>4</sup>, Karel G.M. Moons<sup>4,5</sup>, Evangelos Evangelou <sup>1,2,3</sup> and Lazaros Belbasis <sup>1</sup>

<sup>1</sup>Dept of Hygiene and Epidemiology, University of Ioannina Medical School, Ioannina, Greece. <sup>2</sup>Dept of Epidemiology and Biostatistics, School of Public Health, Imperial College London, London, UK. <sup>3</sup>Institute of Biosciences, University Research Center of Ioannina, Ioannina, Greece. <sup>4</sup>Julius Center for Health Sciences and Primary Care, University Medical Centre Utrecht, Utrecht University, Utrecht, The Netherlands. <sup>5</sup>Cochrane Netherlands, University Medical Centre Utrecht, Utrecht University, Utrecht, The Netherlands.

Corresponding author: Lazaros Belbasis ([lbelbasis@cc.uoi.gr](mailto:lbelbasis@cc.uoi.gr))

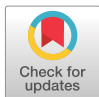

Shareable abstract (@ERSpublications)

ACE inhibitors, sleep apnoea, pharyngalgia, VTE history, sex, coronary heart disease, cancer, liver disease, COPD, dementia, immunosuppressive drugs, peripheral arterial disease, rheumatological disease and smoking predict outcomes of COVID-19 patients <https://bit.ly/3plaANC>

**Cite this article as:** Bellou V, Tzoulaki I, van Smeden M, *et al.* Prognostic factors for adverse outcomes in patients with COVID-19: a field-wide systematic review and meta-analysis. *Eur Respir J* 2022; 59: 2002964 [DOI: 10.1183/13993003.02964-2020].

This single-page version can be shared freely online.

Copyright ©The authors 2022.

This version is distributed under the terms of the Creative Commons Attribution Non-Commercial Licence 4.0. For commercial reproduction rights and permissions contact [permissions@ersnet.org](mailto:permissions@ersnet.org)

Received: 29 July 2020  
Accepted: 4 June 2021

## Abstract

**Introduction** The individual prognostic factors for coronavirus disease 2019 (COVID-19) are unclear. For this reason, we aimed to present a state-of-the-art systematic review and meta-analysis on the prognostic factors for adverse outcomes in COVID-19 patients.

**Methods** We systematically reviewed PubMed from 1 January 2020 to 26 July 2020 to identify non-overlapping studies examining the association of any prognostic factor with any adverse outcome in patients with COVID-19. Random-effects meta-analysis was performed, and between-study heterogeneity was quantified using  $I^2$  statistic. Presence of small-study effects was assessed by applying the Egger's regression test.

**Results** We identified 428 eligible articles, which were used in a total of 263 meta-analyses examining the association of 91 unique prognostic factors with 11 outcomes. Angiotensin-converting enzyme inhibitors, obstructive sleep apnoea, pharyngalgia, history of venous thromboembolism, sex, coronary heart disease, cancer, chronic liver disease, COPD, dementia, any immunosuppressive medication, peripheral arterial disease, rheumatological disease and smoking were associated with at least one outcome and had >1000 events,  $p < 0.005$ ,  $I^2 < 50\%$ , 95% prediction interval excluding the null value, and absence of small-study effects in the respective meta-analysis. The risk of bias assessment using the Quality in Prognosis Studies tool indicated high risk of bias in 302 out of 428 articles for study participation, 389 articles for adjustment for other prognostic factors and 396 articles for statistical analysis and reporting.

**Conclusions** Our findings could be used for prognostic model building and guide patient selection for randomised clinical trials.

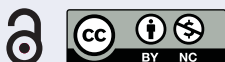

Supplement: ERJ-02964-2020.Shareable.pdf [file ERJ-02964-2020.Shareable.pdf]
